# Supplementary material for: Assessment of the CTOCD-DZ method in a hierarchy of coupled cluster methods
Source: Royal Society of Chemistry journal article supplement (doi:10.1039/b925241j), 2010-01-01
Supplement: b925241j.pdf [file b925241j.pdf]

**Table S-I. NMR shielding constants for CO.**

| C    |          |                |              |                |                      |                |
|------|----------|----------------|--------------|----------------|----------------------|----------------|
|      | cc-pCV5Z |                | aug-cc-pCVQZ |                | CTOCD-1 <sup>a</sup> |                |
|      | $\sigma$ | $\Delta\sigma$ | $\sigma$     | $\Delta\sigma$ | $\sigma$             | $\Delta\sigma$ |
| RPA  | -27.55   | 444.66         | -28.46       | 442.82         | -25.86               | 444.89         |
| CCS  | -27.93   | 406.95         | -29.03       | 405.31         | -26.26               | 407.21         |
| CC2  | 5.75     | 397.01         | 5.02         | 394.65         | 8.14                 | 395.42         |
| CCSD | -2.45    | 322.54         | -3.19        | 405.00         | 0.03                 | 405.76         |
| CC3  | 2.83     | 401.90         | 2.06         | 399.68         | 5.16                 | 400.48         |
| O    |          |                |              |                |                      |                |
|      | cc-pCV5Z |                | aug-cc-pCVQZ |                | CTOCD-1 <sup>a</sup> |                |
|      | $\sigma$ | $\Delta\sigma$ | $\sigma$     | $\Delta\sigma$ | $\sigma$             | $\Delta\sigma$ |
| RPA  | -90.05   | 746.23         | -90.48       | 742.51         | -87.16               | 745.74         |
| CCS  | -46.91   | 629.44         | -47.88       | 626.35         | -44.19               | 629.10         |
| CC2  | -62.76   | 703.51         | -63.24       | 699.48         | -60.50               | 702.57         |
| CCSD | -56.23   | 691.85         | -57.01       | 688.35         | -54.78               | 692.28         |
| CC3  | -55.12   | 693.34         | -55.69       | 689.54         | -53.28               | 693.05         |

(a) aug-cc-pCVTZ-CTOCD-uc basis from Reference [20].

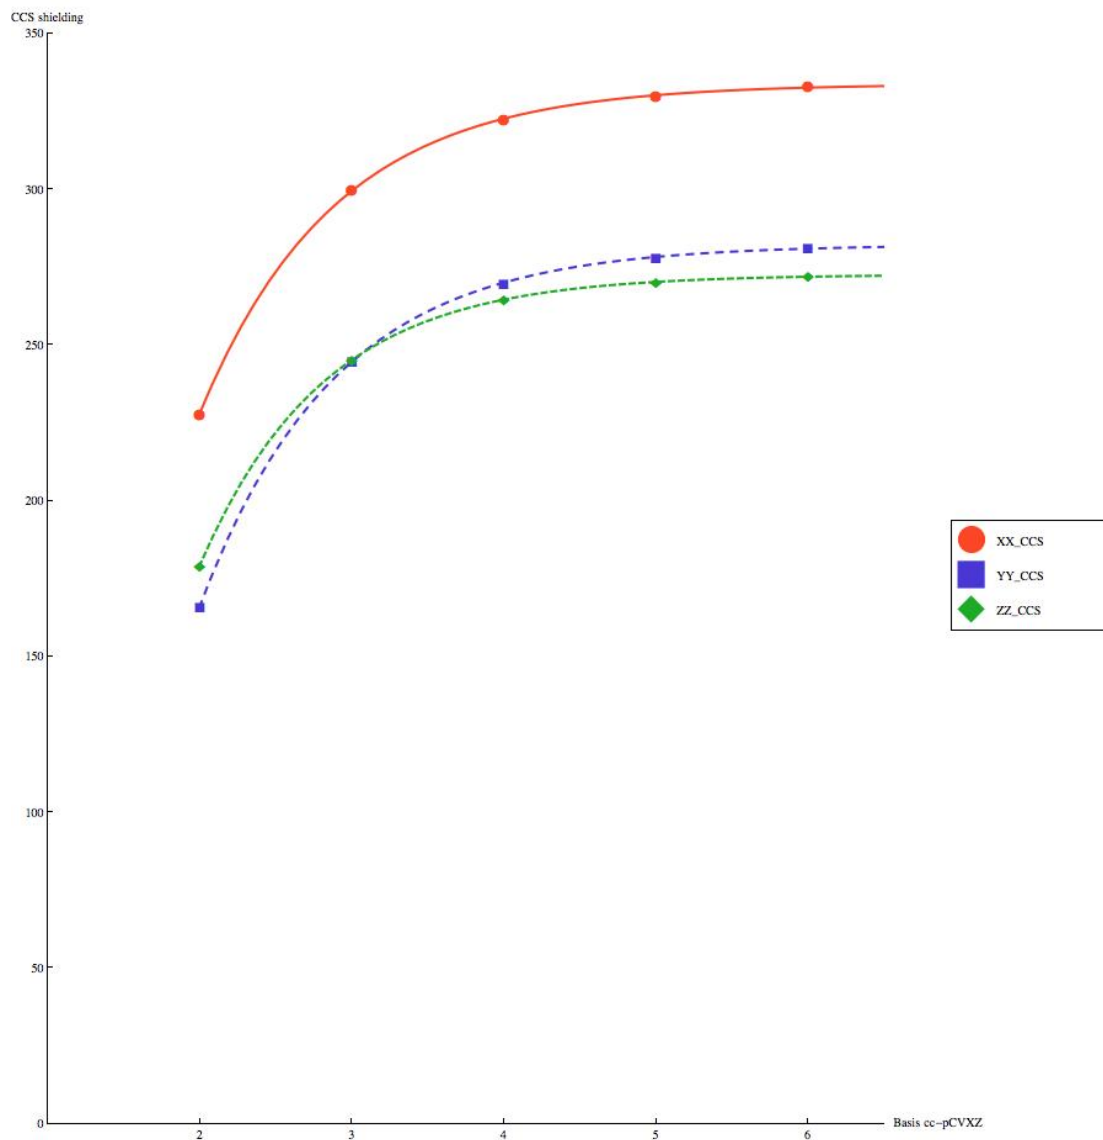

Fig S-1. Variation with the basis set of the different elements of the  $^{17}\text{O}$ -NMR shielding tensor in  $\text{H}_2\text{O}$  calculated at the CCS level.
